# Supplementary material for: Porphyrin Cobalt(III) “Nitrene Radical” Reactivity; Hydrogen Atom Transfer from Ortho-YH Substituents to the Nitrene Moiety of Cobalt-Bound Aryl Nitrene Intermediates (Y = O, NH)
Source: PubMed Central journal article supplement (PMC6274064; doi:10.3390/molecules21020242), 2016-02-20
Supplement: molecules-21-00242-s001.pdf [file molecules-21-00242-s001.pdf]

# Supplementary Materials: Porphyrin Cobalt(III) “Nitrene Radical” Reactivity; Hydrogen Atom Transfer from Ortho-YH Substituents to the Nitrene Moiety of Cobalt-Bound Aryl Nitrene Intermediates (Y = O, NH)

Monalisa Goswami, Christophe Rebreyend and Bas de Bruin

## 1. Experimental Section

All NMR spectra were recorded at 293 K.

**<sup>1</sup>H-NMR:** Bruker Avance 400 (400 MHz) or Mercury 300 (300 MHz), referenced internally to residual solvent resonance of CDCl<sub>3</sub> ( $\delta$  = 7.26 ppm) or DMSO (2.50).

**<sup>13</sup>C{<sup>1</sup>H}-NMR:** Bruker Avance 400 (101 MHz) or Bruker Avance 500 (126 MHz), referenced internally to residual solvent resonance of CDCl<sub>3</sub> ( $\delta$  = 77.2 ppm) or DMSO-d<sub>6</sub> (39.5).

## 2. Spectra

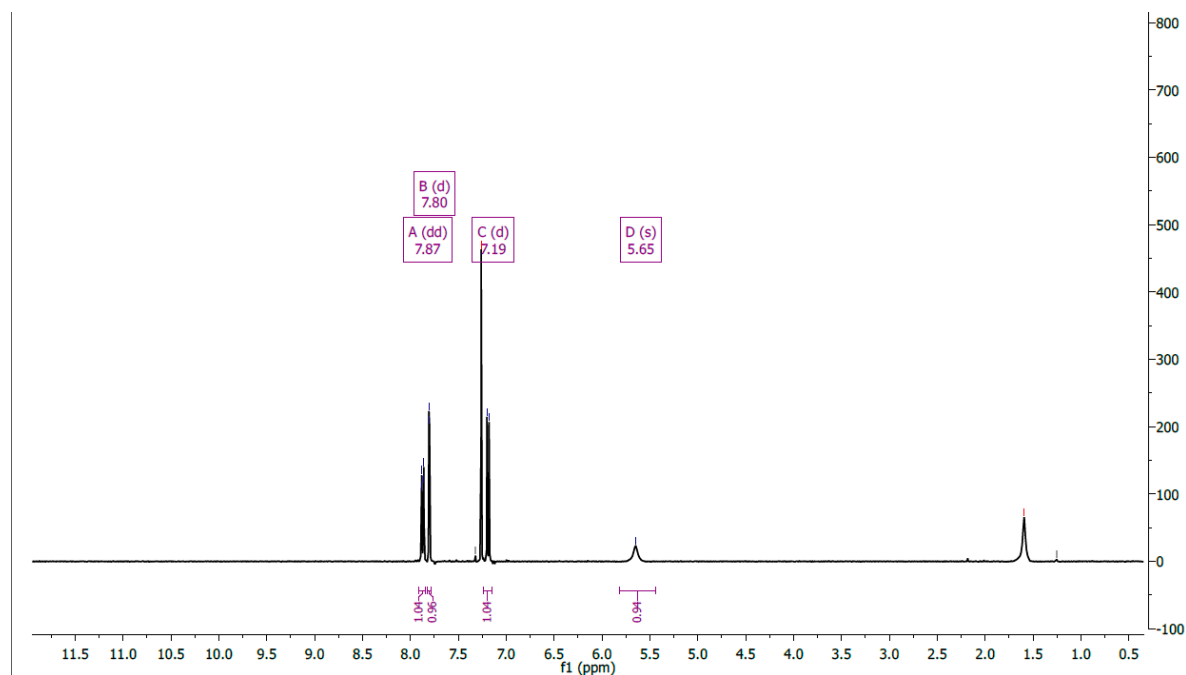

Figure S1. Cont.

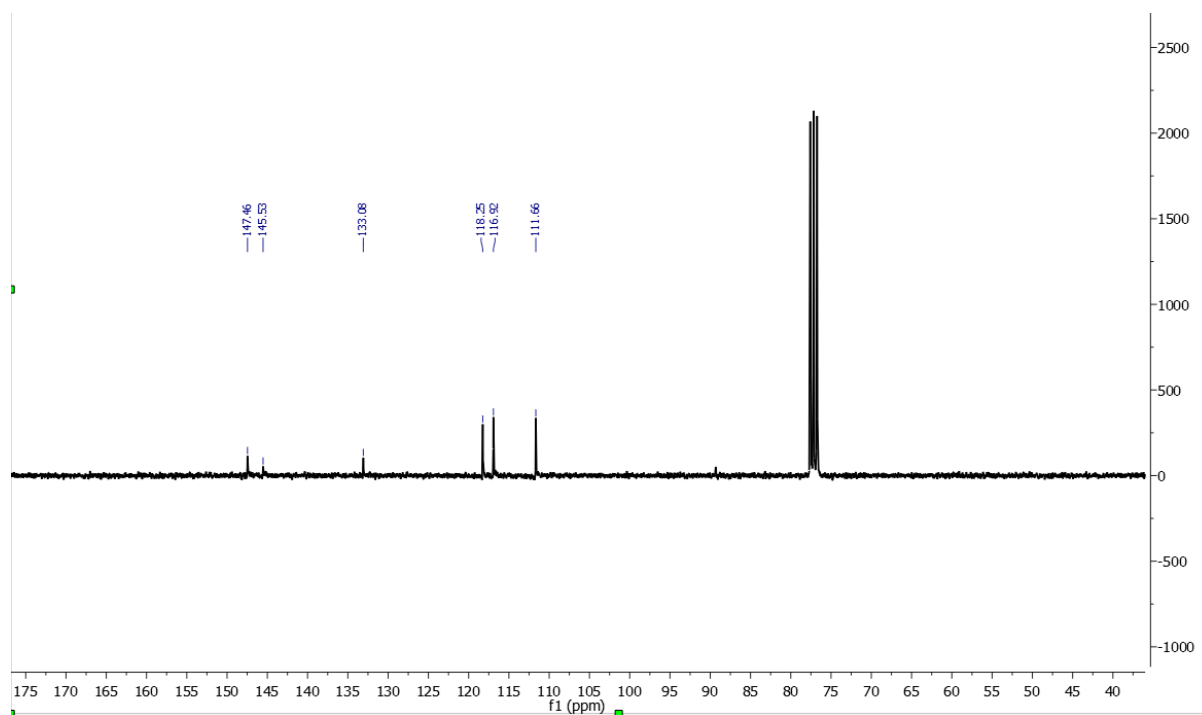

Figure S1. NMR spectra of compound 2-azido-5-nitrophenol 5.

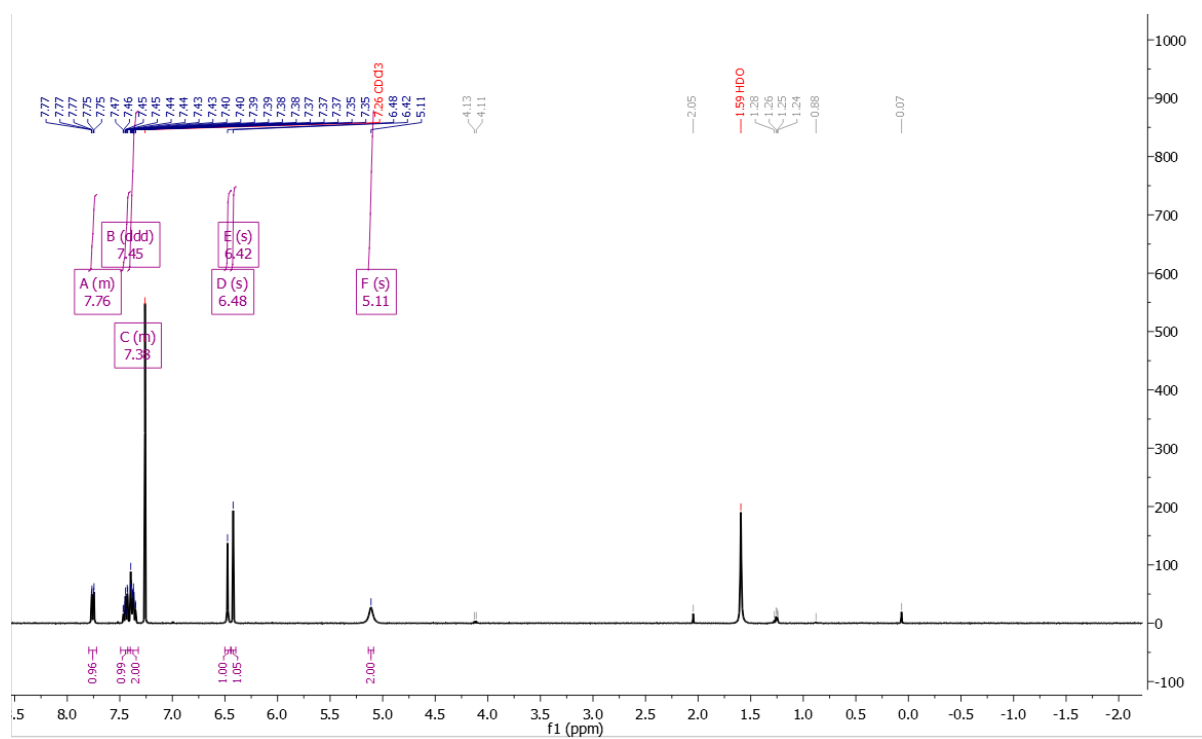

Figure S2. Cont.

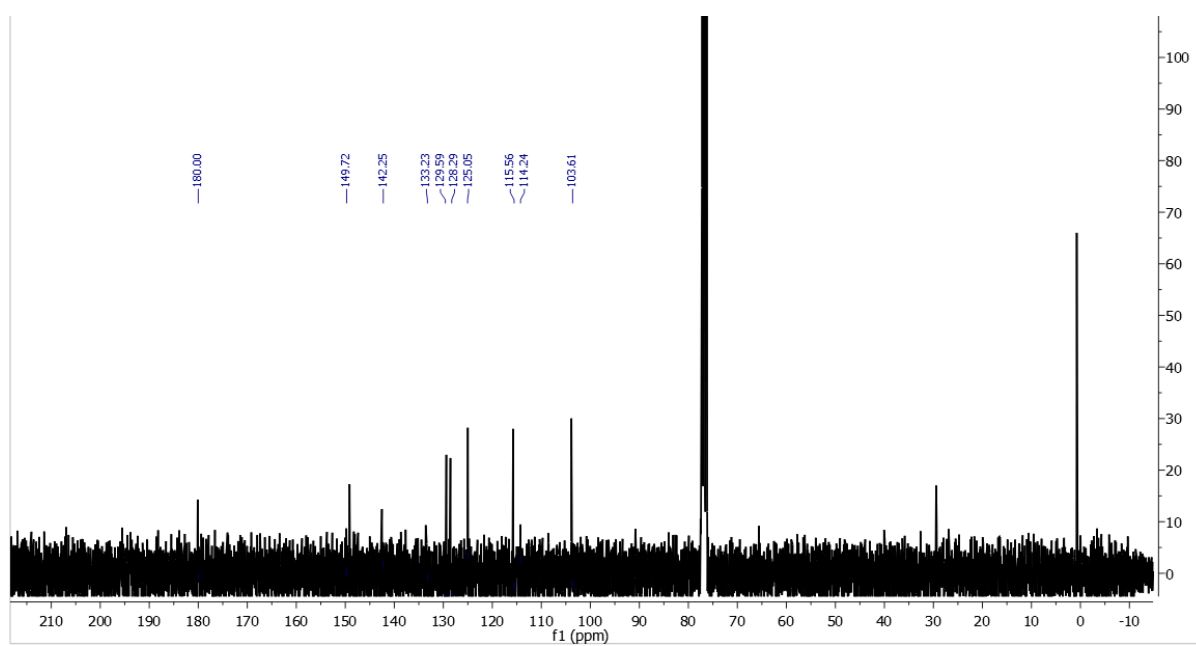

Figure S2. NMR spectra of product 3.

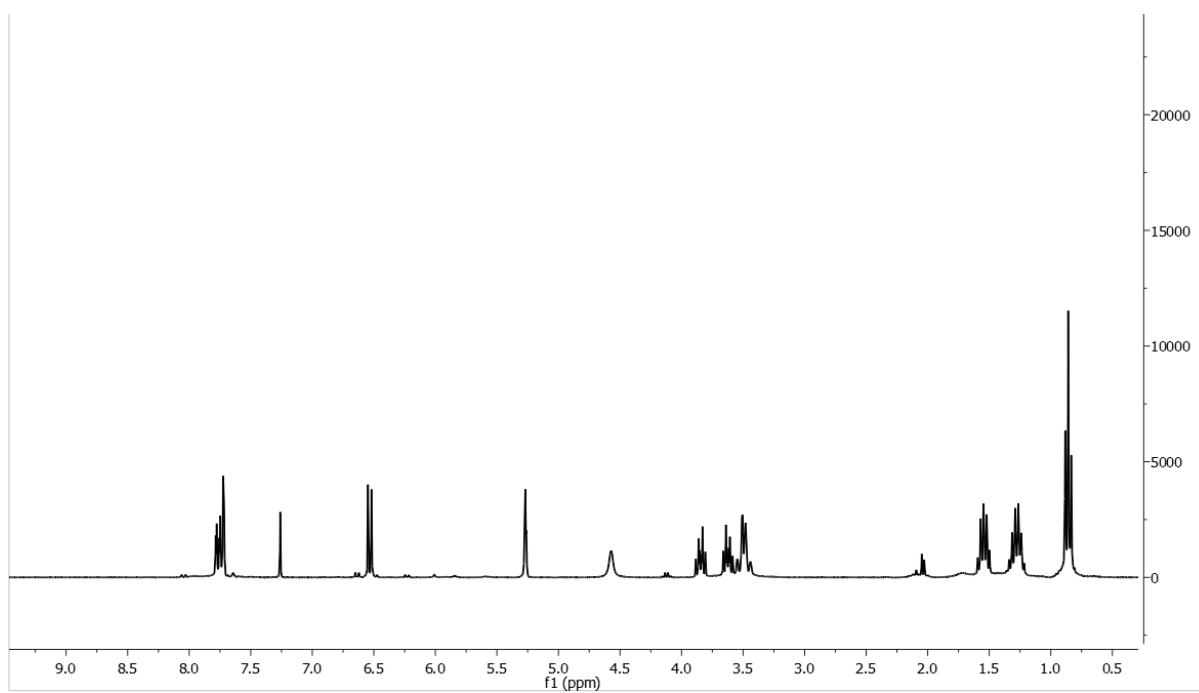

Figure S3. Cont.

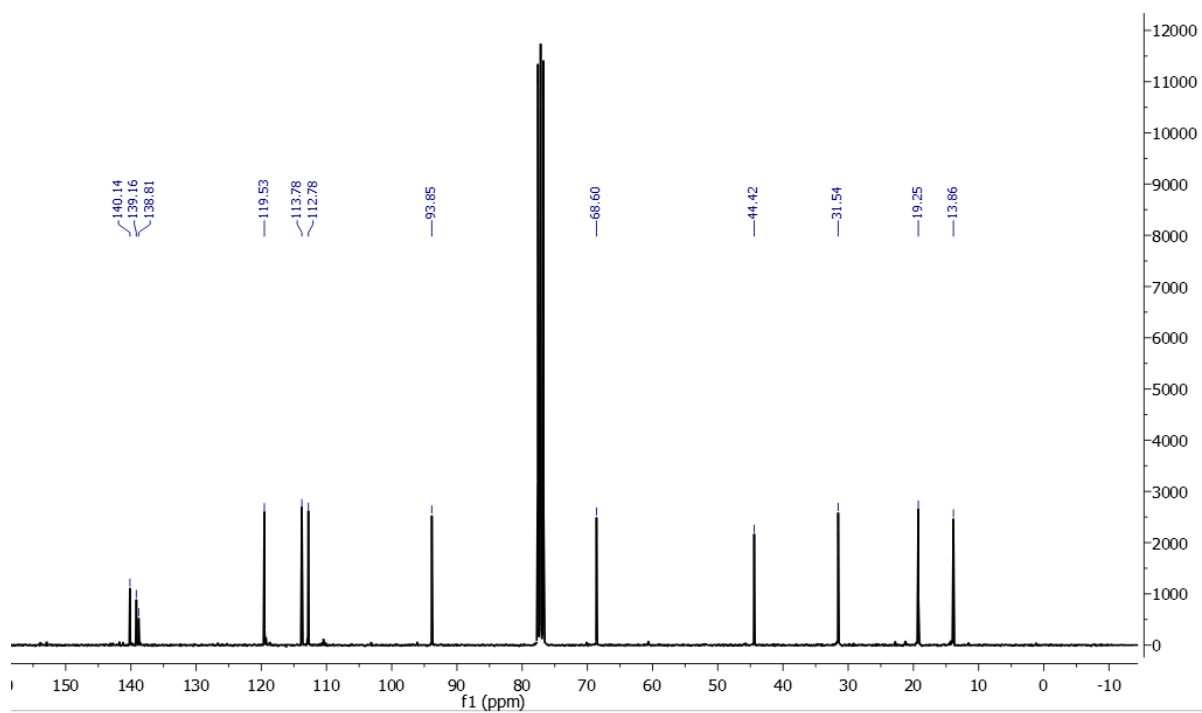

Figure S3. NMR spectra of product 6.

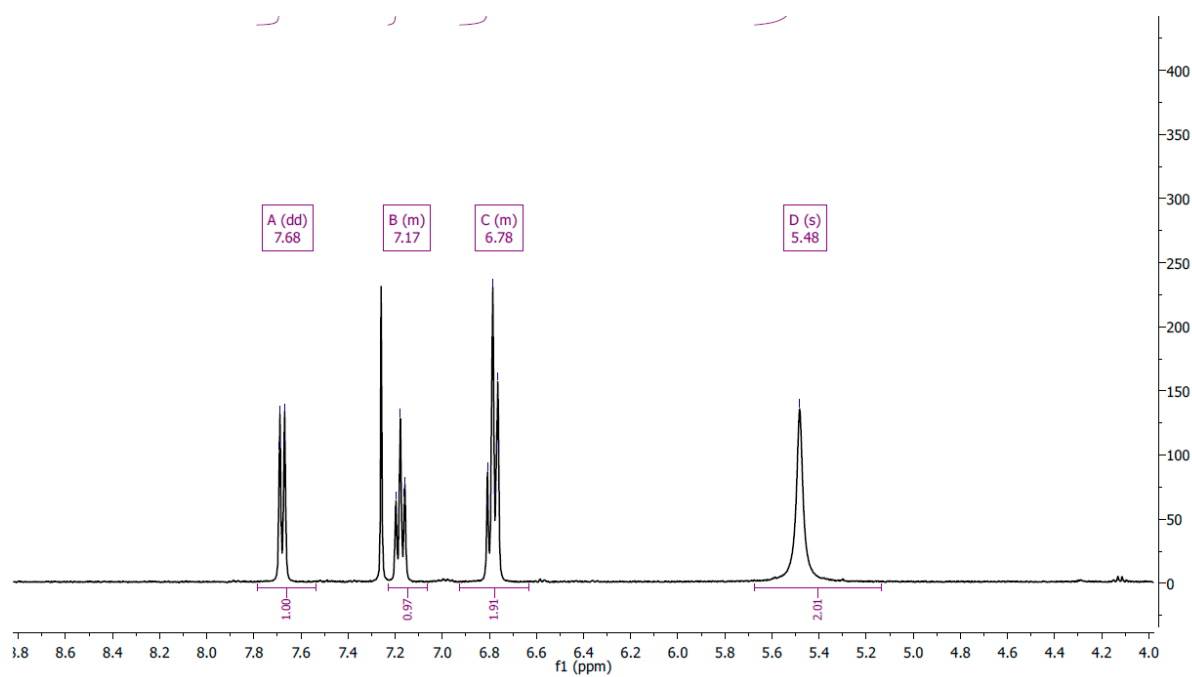

Figure S4. Cont.

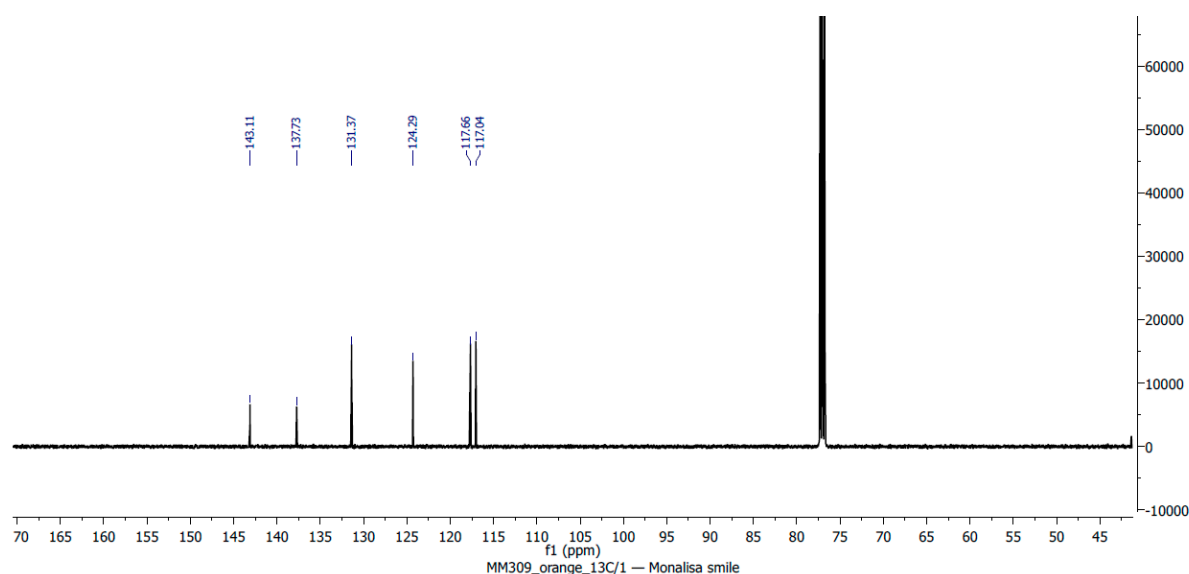

**Figure S4.** NMR spectra of product 8.

### 3. Computational Tables

**Table S1.** SCF energies, enthalpies and free energies of the compounds involved in the HAT step described in Figure 2 in the main text in Hartree (BP86, def2-TZVP, disp3).

|           | E (SCF)     | G           | G_corr  | H_corr  | H           |
|-----------|-------------|-------------|---------|---------|-------------|
| <b>2A</b> | -2938.29618 | -2937.99037 | 0.30581 | 0.39329 | -2937.90289 |
| <b>2B</b> | -2938.28968 | -2937.98881 | 0.30087 | 0.38904 | -2937.90064 |
| <b>2C</b> | -2938.31264 | -2938.0076  | 0.30504 | 0.39402 | -2937.91862 |

**Table S2.** SCF energies, enthalpies and free energies of the compounds involved in the HAT step described in Figure 4 in the main text in Hartree (BP86, def2-TZVP, disp3).

|           | E (SCF)     | G           | G_corr  | H_corr  | H           |
|-----------|-------------|-------------|---------|---------|-------------|
| <b>3A</b> | -2918.49820 | -2918.18056 | 0.31763 | 0.40610 | -2918.09210 |
| <b>3B</b> | -2918.47866 | -2918.16598 | 0.31268 | 0.40124 | -2918.07742 |
| <b>3C</b> | -2918.50309 | -2918.18553 | 0.31755 | 0.40644 | -2918.09665 |

**Table S3.** SCF energies, enthalpies and free energies of the compounds involved in the HAT step described in Figure 6 in the main text in Hartree (BP86, def2-TZVP, disp3).

|           | E (SCF)     | G           | G_corr  | H_corr  | H           |
|-----------|-------------|-------------|---------|---------|-------------|
| <b>4A</b> | -3227.02126 | -3226.62744 | 0.38199 | 0.5198  | -3226.50146 |
| <b>4B</b> | -3227.02225 | -3226.60617 | 0.41609 | 0.52110 | -3226.97014 |
| <b>4C</b> | -3227.06315 | -3226.64472 | 0.41843 | 0.52372 | -3227.58687 |

#### 3.1. X,Y,Z Coordinates of Compound 2A in Figure 2 in Main Text (BP86, def2-TZVP, disp3)

52

Energy = -2938.3767558710

C -0.1000685 0.0070748 2.6874809  
 C 0.5318198 0.0973631 3.9773508  
 C 1.8382627 0.4243430 3.7570128  
 C 1.9930823 0.5947604 2.3362556

|    |            |            |            |
|----|------------|------------|------------|
| H  | 0.0300678  | -0.0911988 | 4.9222908  |
| N  | 0.8026184  | 0.3229538  | 1.6848677  |
| C  | 3.1264653  | 1.1123197  | 1.7304336  |
| H  | 4.0088926  | 1.2770414  | 2.3478306  |
| C  | 3.1533687  | 1.5563900  | 0.4183848  |
| C  | 2.5370051  | 2.0512071  | -1.6316560 |
| C  | 3.8333686  | 2.6497223  | -1.4289484 |
| C  | 4.2284188  | 2.3170485  | -0.1666014 |
| H  | 4.3675806  | 3.2284919  | -2.1773163 |
| H  | 5.1508141  | 2.5751033  | 0.3463224  |
| N  | 2.1161533  | 1.4146612  | -0.4822334 |
| C  | 1.8734009  | 2.0246507  | -2.8480705 |
| H  | 2.3170602  | 2.5665626  | -3.6829197 |
| C  | 0.7456916  | 1.2591285  | -3.0986344 |
| C  | -0.8653401 | -0.2171744 | -2.8704433 |
| C  | -0.7912032 | 0.1035675  | -4.2733262 |
| C  | 0.1885080  | 1.0423422  | -4.4111031 |
| H  | -1.4322234 | -0.3255861 | -5.0383733 |
| H  | 0.5311694  | 1.5385448  | -5.3148578 |
| N  | 0.0695307  | 0.5082744  | -2.1590206 |
| C  | -1.8071440 | -1.0611882 | -2.3050390 |
| H  | -2.4932077 | -1.5858504 | -2.9692861 |
| C  | -1.3914286 | -0.4482343 | 2.4763084  |
| H  | -2.0091901 | -0.6643142 | 3.3472871  |
| C  | -1.8879223 | -0.7770607 | 1.2251548  |
| C  | -3.1108074 | -1.5015395 | 0.9994232  |
| C  | -3.1685314 | -1.7759201 | -0.3361843 |
| C  | -2.0122119 | -1.1668951 | -0.9388642 |
| H  | -3.8143156 | -1.7779853 | 1.7797068  |
| H  | -3.9394704 | -2.3093582 | -0.8851543 |
| N  | -1.2228654 | -0.5680053 | 0.0275789  |
| H  | 2.6298477  | 0.5791539  | 4.4849028  |
| Co | 0.5238868  | 0.2631578  | -0.2487425 |
| N  | 1.5069792  | -1.2158937 | -0.6359598 |
| C  | 1.5402940  | -2.3863351 | -0.0261767 |
| C  | 1.9939175  | -5.0055626 | 0.9094028  |
| C  | 2.5186268  | -3.2823381 | -0.6625876 |
| C  | 0.8184004  | -2.9077756 | 1.0962364  |
| C  | 1.0403584  | -4.1871565 | 1.5515880  |
| C  | 2.7349192  | -4.5675039 | -0.1930995 |
| H  | 0.0869390  | -2.2738288 | 1.5841691  |
| H  | 0.4953531  | -4.5895653 | 2.4030500  |
| H  | 3.4645650  | -5.2207404 | -0.6673177 |
| O  | 3.1928934  | -2.7925309 | -1.7145499 |
| H  | 2.8147426  | -1.8643719 | -1.7919898 |
| N  | 2.2184746  | -6.3611540 | 1.4149137  |
| O  | 3.0616254  | -7.0649812 | 0.8375141  |
| O  | 1.5527328  | -6.7330572 | 2.3956437  |

### 3.2. X,Y,Z Coordinates of Compound 2B in Figure 2 in Main Text (BP86, def2-TZVP, disp3)

Energy = -2938.3703671230

|    |            |            |            |
|----|------------|------------|------------|
| C  | -0.1099678 | 0.0354651  | 2.6910147  |
| C  | 0.5250115  | 0.1219400  | 3.9795563  |
| C  | 1.8319685  | 0.4435863  | 3.7566796  |
| C  | 1.9844156  | 0.6117139  | 2.3356431  |
| H  | 0.0242290  | -0.0657501 | 4.9251323  |
| N  | 0.7900342  | 0.3505792  | 1.6864044  |
| C  | 3.1242809  | 1.1079354  | 1.7257807  |
| H  | 4.0080664  | 1.2683494  | 2.3423602  |
| C  | 3.1630427  | 1.5276146  | 0.4068251  |
| C  | 2.5667162  | 1.9959036  | -1.6561419 |
| C  | 3.8695748  | 2.5779797  | -1.4550127 |
| C  | 4.2517323  | 2.2615475  | -0.1848443 |
| H  | 4.4178611  | 3.1334225  | -2.2107017 |
| H  | 5.1754056  | 2.5131907  | 0.3287304  |
| N  | 2.1271709  | 1.3851443  | -0.4974901 |
| C  | 1.9102954  | 1.9593772  | -2.8751251 |
| H  | 2.3673865  | 2.4783494  | -3.7171235 |
| C  | 0.7728729  | 1.2069666  | -3.1163606 |
| C  | -0.8677199 | -0.2337719 | -2.8663595 |
| C  | -0.7809653 | 0.0582967  | -4.2739862 |
| C  | 0.2171819  | 0.9749275  | -4.4256004 |
| H  | -1.4264081 | -0.3741738 | -5.0333201 |
| H  | 0.5744283  | 1.4453249  | -5.3373715 |
| N  | 0.0792813  | 0.4868705  | -2.1631497 |
| C  | -1.8312830 | -1.0451180 | -2.2914616 |
| H  | -2.5235377 | -1.5676423 | -2.9508640 |
| C  | -1.4051276 | -0.4096000 | 2.4848041  |
| H  | -2.0209821 | -0.6214538 | 3.3581439  |
| C  | -1.9102050 | -0.7306887 | 1.2358069  |
| C  | -3.1420882 | -1.4412347 | 1.0155958  |
| C  | -3.2065671 | -1.7188524 | -0.3187129 |
| C  | -2.0436320 | -1.1272067 | -0.9254323 |
| H  | -3.8460991 | -1.7076628 | 1.7989044  |
| H  | -3.9841110 | -2.2460804 | -0.8642899 |
| N  | -1.2472163 | -0.5288750 | 0.0358450  |
| H  | 2.6265832  | 0.5927955  | 4.4823000  |
| Co | 0.5119913  | 0.2816263  | -0.2495060 |
| N  | 1.4600569  | -1.2347963 | -0.5723789 |
| C  | 1.4915754  | -2.4005717 | 0.0388386  |
| C  | 2.0589261  | -5.0134006 | 0.8464985  |
| C  | 2.5437612  | -3.2061406 | -0.6394905 |
| C  | 0.7664801  | -2.9781150 | 1.1197913  |
| C  | 1.0506164  | -4.2668094 | 1.5105797  |
| C  | 2.8098994  | -4.5111827 | -0.2163025 |
| H  | -0.0033442 | -2.4025040 | 1.6249388  |
| H  | 0.5157299  | -4.7417875 | 2.3302028  |
| H  | 3.5769650  | -5.1168667 | -0.6937694 |
| O  | 3.1292702  | -2.5551174 | -1.6088707 |
| H  | 2.4403934  | -1.5514817 | -1.4228539 |
| N  | 2.3233250  | -6.3819665 | 1.3063974  |
| O  | 3.2064181  | -7.0302968 | 0.7256929  |

O 1.6483090 -6.8187621 2.2540530

### 3.3. X,Y,Z Coordinates of Compound 2C in Figure 2 in Main Text (BP86, def2-TZVP, disp3)

52

Energy = -2938.3948562410

C -1.0180320 -0.2089291 2.8325966  
C -0.6492225 -0.1190427 4.2219149  
C 0.6359665 0.3376159 4.2610607  
C 1.0682098 0.4848884 2.8950045  
H -1.3122067 -0.3496910 5.0511710  
N 0.0447237 0.1532515 2.0253124  
C 2.3565449 0.8254137 2.5132350  
H 3.0762389 1.0638864 3.2958283  
C 2.8113415 0.7712015 1.2056690  
C 2.9142001 0.3512325 -0.9503790  
C 4.2641857 0.5760582 -0.5042191  
C 4.1967160 0.8706630 0.8264410  
H 5.1394309 0.5376864 -1.1465801  
H 5.0067737 1.1080413 1.5103270  
N 2.0289276 0.4729559 0.1042141  
C 2.5516891 0.1383907 -2.2714646  
H 3.3456265 0.0372627 -3.0105330  
C 1.2424177 0.1658504 -2.7222706  
C -0.9492001 0.3488280 -2.7715841  
C -0.4994480 0.3304418 -4.1403504  
C 0.8561156 0.1853480 -4.1091585  
H -1.1554864 0.3928742 -5.0039599  
H 1.5503232 0.1158455 -4.9417160  
N 0.1283125 0.2775917 -1.9098776  
C -2.2799617 0.3254850 -2.3852961  
H -3.0384693 0.3927493 -3.1646825  
C -2.2950383 -0.5010153 2.3811170  
H -3.0477637 -0.7745471 3.1200986  
C -2.7017497 -0.3497084 1.0649663  
C -4.0719613 -0.4234395 0.6237789  
C -4.0766116 -0.1103489 -0.7033383  
C -2.7041964 0.1139051 -1.0832361  
H -4.9139130 -0.6623937 1.2675482  
H -4.9212034 -0.0502415 -1.3840779  
N -1.8722306 -0.0139016 0.0129203  
H 1.2550016 0.5490587 5.1285668  
Co 0.1012362 0.0600361 0.0560039  
N 0.3071564 -1.8290015 -0.2383752  
C 1.4090976 -2.5555964 -0.1725827  
C 3.7636866 -4.0712015 -0.1765730  
C 1.6845726 -3.4914502 -1.3175816  
C 2.3279814 -2.4695478 0.9198710  
C 3.4804224 -3.2016956 0.9250129  
C 2.9299086 -4.2372240 -1.2463925  
H 2.0830818 -1.8032449 1.7453041  
H 4.1930276 -3.1472249 1.7443099



|   |            |            |            |
|---|------------|------------|------------|
| H | 3.1859470  | -4.9063467 | -2.0654386 |
| O | 0.8886326  | -3.5855275 | -2.2695200 |
| N | 5.0480029  | -4.8245399 | -0.1506664 |
| O | 5.2730143  | -5.6192022 | -1.0668237 |
| O | 5.8171148  | -4.6014789 | 0.7924751  |
| H | -0.2100509 | -2.1031656 | -1.0914606 |

### 3.4. X,Y,Z Coordinates of Compound 3A in Figure 4 in Main Text (BP86, def2-TZVP, disp3)

53

Energy = -2918.4981954630

|    |            |            |            |
|----|------------|------------|------------|
| C  | -0.1542683 | 0.0308018  | 2.6479195  |
| C  | 0.4717602  | 0.1422034  | 3.9392296  |
| C  | 1.7725703  | 0.4912208  | 3.7200999  |
| C  | 1.9286694  | 0.6524414  | 2.2980215  |
| H  | -0.0296275 | -0.0475954 | 4.8841421  |
| N  | 0.7459307  | 0.3527066  | 1.6451340  |
| C  | 3.0546469  | 1.1868130  | 1.6927269  |
| H  | 3.9304786  | 1.3741409  | 2.3132987  |
| C  | 3.0790851  | 1.6218678  | 0.3772752  |
| C  | 2.4621235  | 2.0896748  | -1.6779938 |
| C  | 3.7479820  | 2.7119249  | -1.4761631 |
| C  | 4.1436062  | 2.3969283  | -0.2091656 |
| H  | 4.2737708  | 3.2963256  | -2.2263160 |
| H  | 5.0580492  | 2.6777669  | 0.3063266  |
| N  | 2.0491954  | 1.4538923  | -0.5259690 |
| C  | 1.8004475  | 2.0470699  | -2.8955301 |
| H  | 2.2375143  | 2.5918642  | -3.7321771 |
| C  | 0.6795042  | 1.2702369  | -3.1438219 |
| C  | -0.9207448 | -0.2157051 | -2.9113155 |
| C  | -0.8518756 | 0.1036606  | -4.3152295 |
| C  | 0.1222514  | 1.0480652  | -4.4559244 |
| H  | -1.4928069 | -0.3293422 | -5.0783390 |
| H  | 0.4590273  | 1.5467308  | -5.3606804 |
| N  | 0.0106283  | 0.5156003  | -2.2028832 |
| C  | -1.8548254 | -1.0668594 | -2.3429599 |
| H  | -2.5401149 | -1.5953907 | -3.0051449 |
| C  | -1.4385959 | -0.4445499 | 2.4371261  |
| H  | -2.0543989 | -0.6645288 | 3.3085705  |
| C  | -1.9312017 | -0.7833636 | 1.1869331  |
| C  | -3.1492312 | -1.5173537 | 0.9634720  |
| C  | -3.2069824 | -1.7919566 | -0.3719345 |
| C  | -2.0551427 | -1.1748592 | -0.9761532 |
| H  | -3.8497516 | -1.7983879 | 1.7448435  |
| H  | -3.9753564 | -2.3301094 | -0.9201165 |
| N  | -1.2679857 | -0.5716124 | -0.0109132 |
| H  | 2.5587986  | 0.6671956  | 4.4490795  |
| Co | 0.4689096  | 0.2787055  | -0.2876759 |
| N  | 1.4821356  | -1.1919847 | -0.6847613 |
| C  | 1.5347026  | -2.3598829 | -0.0834682 |
| C  | 1.9936769  | -4.9506639 | 0.9684598  |
| C  | 2.5123723  | -3.2860811 | -0.7008099 |

|   |           |            |            |
|---|-----------|------------|------------|
| C | 0.8150696 | -2.8554123 | 1.0590505  |
| C | 1.0342058 | -4.1087118 | 1.5735772  |
| C | 2.7215165 | -4.5518794 | -0.1516551 |
| H | 0.0832583 | -2.2019148 | 1.5179310  |
| H | 0.4881889 | -4.4723406 | 2.4416441  |
| H | 3.4461501 | -5.2400776 | -0.5864517 |
| N | 2.2322200 | -6.2763981 | 1.5275140  |
| O | 3.0879261 | -6.9962235 | 0.9827435  |
| O | 1.5677478 | -6.6187757 | 2.5214032  |
| N | 3.1636012 | -2.8512293 | -1.8106767 |
| H | 3.0129225 | -1.8754551 | -2.0609494 |
| H | 3.9569820 | -3.3584901 | -2.1791670 |

### 3.5. X,Y,Z Coordinates of Compound 3B in Figure 4 in Main Text (BP86, def2-TZVP, disp3)

53

Energy = -2918.4786616970

|   |            |            |            |
|---|------------|------------|------------|
| C | -0.1593583 | -0.0014974 | 2.6180856  |
| C | 0.4873922  | 0.0682778  | 3.9023353  |
| C | 1.7916415  | 0.3935517  | 3.6714716  |
| C | 1.9307839  | 0.5765904  | 2.2504100  |
| H | -0.0049132 | -0.1308775 | 4.8500713  |
| N | 0.7307161  | 0.3240292  | 1.6088086  |
| C | 3.0689345  | 1.0714778  | 1.6366906  |
| H | 3.9560100  | 1.2265520  | 2.2499905  |
| C | 3.1055733  | 1.4917941  | 0.3177453  |
| C | 2.5075539  | 1.9622970  | -1.7438062 |
| C | 3.8177583  | 2.5301945  | -1.5485727 |
| C | 4.1998834  | 2.2141585  | -0.2780758 |
| H | 4.3682773  | 3.0802949  | -2.3066597 |
| H | 5.1263685  | 2.4598888  | 0.2336021  |
| N | 2.0658714  | 1.3567992  | -0.5833311 |
| C | 1.8422566  | 1.9407833  | -2.9587186 |
| H | 2.3018136  | 2.4566366  | -3.8014391 |
| C | 0.6855109  | 1.2165223  | -3.1942366 |
| C | -0.9929466 | -0.1764113 | -2.9369651 |
| C | -0.9184767 | 0.1301289  | -4.3427352 |
| C | 0.1056929  | 1.0167041  | -4.4987346 |
| H | -1.5895056 | -0.2714472 | -5.0968796 |
| H | 0.4629046  | 1.4886783  | -5.4098252 |
| N | -0.0139039 | 0.5043029  | -2.2396772 |
| C | -1.9722647 | -0.9667921 | -2.3589830 |
| H | -2.6906997 | -1.4565467 | -3.0155918 |
| C | -1.4602983 | -0.4332404 | 2.4212155  |
| H | -2.0667088 | -0.6532611 | 3.2992151  |
| C | -1.9885030 | -0.7221086 | 1.1740559  |
| C | -3.2401153 | -1.4002488 | 0.9599407  |
| C | -3.3334991 | -1.6446538 | -0.3789281 |
| C | -2.1655530 | -1.0678591 | -0.9914416 |
| H | -3.9368501 | -1.6681545 | 1.7493092  |
| H | -4.1322916 | -2.1406153 | -0.9231611 |
| N | -1.3387995 | -0.5110396 | -0.0313733 |

|    |            |            |            |
|----|------------|------------|------------|
| H  | 2.5932286  | 0.5347245  | 4.3911183  |
| Co | 0.4333487  | 0.2765846  | -0.3265012 |
| N  | 1.3868922  | -1.2552198 | -0.6625962 |
| C  | 1.4819520  | -2.3905188 | -0.0137602 |
| C  | 2.1417536  | -4.9379927 | 0.9806430  |
| C  | 2.6570496  | -3.1581497 | -0.5507523 |
| C  | 0.6989178  | -2.9854252 | 1.0204615  |
| C  | 1.0209152  | -4.2312669 | 1.5008268  |
| C  | 2.9583998  | -4.4281108 | -0.0198573 |
| H  | -0.1543452 | -2.4440978 | 1.4180005  |
| H  | 0.4346101  | -4.7060125 | 2.2845342  |
| H  | 3.8150571  | -5.0037131 | -0.3673338 |
| N  | 2.4510066  | -6.2567178 | 1.5345177  |
| O  | 3.4233018  | -6.8736659 | 1.0686535  |
| O  | 1.7248500  | -6.6928615 | 2.4452308  |
| N  | 3.2545103  | -2.4514799 | -1.5018937 |
| H  | 2.4540113  | -1.4322874 | -1.4198729 |
| H  | 4.0872848  | -2.8086983 | -1.9622304 |

### 3.6. X,Y,Z Coordinates of Compound 3C in Figure 4 in main text (BP86, def2-TZVP, disp3)

53

Energy = -2918.5030858880

|   |            |            |            |
|---|------------|------------|------------|
| C | -0.2934206 | -0.4024895 | 2.4797454  |
| C | 0.3928664  | -0.5819766 | 3.7329208  |
| C | 1.7226607  | -0.4062611 | 3.4829453  |
| C | 1.8431930  | -0.0687636 | 2.0885846  |
| H | -0.0930349 | -0.8381824 | 4.6702613  |
| N | 0.6025312  | -0.0668704 | 1.4800062  |
| C | 3.0332300  | 0.2812397  | 1.4699073  |
| H | 3.9512944  | 0.2146878  | 2.0527135  |
| C | 3.1099525  | 0.8168707  | 0.1950142  |
| C | 2.5498442  | 1.6083472  | -1.7778578 |
| C | 3.9480438  | 1.9023154  | -1.5913465 |
| C | 4.3017506  | 1.3854668  | -0.3798503 |
| H | 4.5704050  | 2.4179349  | -2.3173563 |
| H | 5.2728849  | 1.3998928  | 0.1069808  |
| N | 2.0392378  | 0.9661755  | -0.6668506 |
| C | 1.8516486  | 1.8467664  | -2.9507784 |
| H | 2.3675018  | 2.3727238  | -3.7537771 |
| C | 0.5747702  | 1.3717727  | -3.2022606 |
| C | -1.3236202 | 0.2825848  | -3.0146281 |
| C | -1.2510862 | 0.7626767  | -4.3720107 |
| C | -0.0841010 | 1.4590518  | -4.4818110 |
| H | -2.0162840 | 0.5967163  | -5.1252580 |
| H | 0.3192103  | 1.9766896  | -5.3478109 |
| N | -0.2037263 | 0.6666172  | -2.3038176 |
| C | -2.4091457 | -0.3957276 | -2.4839088 |
| H | -3.2301009 | -0.6486138 | -3.1542572 |
| C | -1.6379163 | -0.6727310 | 2.2847368  |
| H | -2.2373587 | -0.9400178 | 3.1546304  |
| C | -2.2422146 | -0.7209807 | 1.0382219  |

|    |            |            |            |
|----|------------|------------|------------|
| C  | -3.5892090 | -1.1766464 | 0.8055983  |
| C  | -3.7802110 | -1.1702415 | -0.5450671 |
| C  | -2.5637108 | -0.6734130 | -1.1355458 |
| H  | -4.2832643 | -1.4704719 | 1.5883096  |
| H  | -4.6687813 | -1.4466266 | -1.1059022 |
| N  | -1.6217945 | -0.4109853 | -0.1581825 |
| H  | 2.5574291  | -0.4713679 | 4.1751326  |
| Co | 0.2480800  | 0.1457254  | -0.4523058 |
| N  | 1.0712951  | -1.5290537 | -1.0151113 |
| C  | 1.5800588  | -2.4698098 | -0.2415239 |
| C  | 2.7451659  | -4.3688221 | 1.4693475  |
| C  | 2.9658475  | -2.9566697 | -0.5082344 |
| C  | 0.8432389  | -3.0180884 | 0.8586397  |
| C  | 1.3993549  | -3.9356801 | 1.7006142  |
| C  | 3.5033820  | -3.9270034 | 0.4237751  |
| H  | -0.1774315 | -2.6684863 | 1.0052069  |
| H  | 0.8525253  | -4.3510966 | 2.5433355  |
| H  | 4.5231047  | -4.2914839 | 0.2990339  |
| N  | 3.3428882  | -5.3368663 | 2.4215519  |
| O  | 4.4863691  | -5.7464506 | 2.1958754  |
| O  | 2.6563921  | -5.6729147 | 3.3940192  |
| N  | 3.5983048  | -2.4541744 | -1.5342682 |
| H  | 1.7507437  | -1.3209306 | -1.7656125 |
| H  | 4.5459222  | -2.8436557 | -1.6095985 |

### 3.7. X,Y,Z Coordinates of Compound 4B in Figure 6 in main text (BP86, def2-TZVP, disp3)

67

Energy = -3227.0221914460

|   |            |            |            |
|---|------------|------------|------------|
| C | 0.0700493  | -0.3051630 | 2.3628844  |
| C | 1.0502664  | -0.4052898 | 3.4139151  |
| C | 2.2462227  | -0.6589901 | 2.8131434  |
| C | 1.9985259  | -0.6884479 | 1.3942441  |
| H | 0.8282018  | -0.3091999 | 4.4730579  |
| N | 0.6620631  | -0.4613594 | 1.1225707  |
| C | 2.9807805  | -0.9055270 | 0.4449747  |
| H | 3.9946760  | -1.0969017 | 0.7945658  |
| C | 2.7635897  | -0.8537793 | -0.9203220 |
| C | 1.8037393  | -0.6362077 | -2.8879019 |
| C | 3.2032818  | -0.8669247 | -3.1299471 |
| C | 3.7989692  | -1.0038848 | -1.9086669 |
| H | 3.6565987  | -0.9024883 | -4.1168292 |
| H | 4.8481737  | -1.1695771 | -1.6787237 |
| N | 1.5373149  | -0.6369678 | -1.5262437 |
| C | 0.8693894  | -0.4140079 | -3.8841549 |
| H | 1.2114334  | -0.4184240 | -4.9185027 |
| C | -0.4768028 | -0.2070760 | -3.6475663 |
| C | -2.4408964 | -0.1313778 | -2.6735783 |
| C | -2.6667293 | 0.0761356  | -4.0818473 |
| C | -1.4448347 | 0.0445313  | -4.6839600 |
| H | -3.6428209 | 0.2391011  | -4.5306081 |
| H | -1.1984405 | 0.1557196  | -5.7357961 |

|    |            |            |            |
|----|------------|------------|------------|
| N  | -1.0910622 | -0.2792768 | -2.4109660 |
| C  | -3.4494599 | -0.1474839 | -1.7270755 |
| H  | -4.4786456 | -0.0751195 | -2.0779287 |
| C  | -1.2860796 | -0.1566152 | 2.5927331  |
| H  | -1.6205721 | -0.0719363 | 3.6264562  |
| C  | -2.2472730 | -0.1414616 | 1.5970450  |
| C  | -3.6648054 | -0.0535151 | 1.8439529  |
| C  | -4.2769503 | -0.0869819 | 0.6263401  |
| C  | -3.2304115 | -0.1782562 | -0.3609008 |
| H  | -4.1143158 | 0.0278743  | 2.8299675  |
| H  | -5.3374818 | -0.0321980 | 0.3961537  |
| N  | -1.9905396 | -0.2135007 | 0.2424250  |
| H  | 3.2200187  | -0.8084164 | 3.2710206  |
| Co | -0.2394801 | -0.6014220 | -0.6476638 |
| N  | -0.5817213 | -2.4565176 | -0.5987265 |
| C  | 0.2203713  | -3.2283814 | 0.2238724  |
| C  | 1.8346186  | -4.6144083 | 2.0321629  |
| C  | 1.4545145  | -3.8152948 | -0.2164643 |
| C  | -0.1841594 | -3.4266804 | 1.5670438  |
| C  | 0.6107766  | -4.0962116 | 2.4795702  |
| C  | 2.2554356  | -4.4972308 | 0.7137229  |
| H  | -1.1293966 | -2.9790335 | 1.8729650  |
| H  | 0.3203428  | -4.2172355 | 3.5200874  |
| H  | 3.2178120  | -4.9165641 | 0.4224292  |
| N  | 2.7212417  | -5.2899954 | 2.9972882  |
| O  | 3.8080618  | -5.7202005 | 2.5866406  |
| O  | 2.3347107  | -5.3828663 | 4.1695221  |
| N  | 1.8257513  | -3.7128072 | -1.5320226 |
| H  | 1.3427354  | -2.9912852 | -2.0626751 |
| H  | 2.8159857  | -3.7799236 | -1.7415046 |
| C  | -0.9386092 | -3.7212466 | -3.0757589 |
| H  | -2.0926977 | -4.0805797 | -1.2207595 |
| C  | -1.3863235 | -3.6555406 | -1.9135040 |
| C  | -0.3434070 | -3.6463519 | -4.3446257 |
| C  | 0.8457827  | -3.4412291 | -6.9009004 |
| C  | -1.0119159 | -2.9915852 | -5.4110545 |
| C  | 0.9240444  | -4.2297536 | -4.6083546 |

### 3.8. X,Y,Z Coordinates of Compound 4C in Figure 6 in main text (BP86, def2-TZVP, disp3)

67

Energy = -3227.0631494640

|   |           |            |            |
|---|-----------|------------|------------|
| C | 0.6557974 | -1.4131167 | 1.8356173  |
| C | 1.7543772 | -1.7245754 | 2.7132858  |
| C | 2.8410438 | -1.0580103 | 2.2321900  |
| C | 2.4093291 | -0.3575083 | 1.0487403  |
| H | 1.6801109 | -2.3632924 | 3.5887997  |
| N | 1.0663197 | -0.5852116 | 0.8049367  |
| C | 3.2486443 | 0.4123381  | 0.2617320  |
| H | 4.2860730 | 0.5219369  | 0.5777456  |
| C | 2.8616974 | 1.0252159  | -0.9171917 |
| C | 1.6746247 | 1.7007622  | -2.6362584 |

C 3.0190242 2.1716187 -2.8484692  
C 3.7525871 1.7653791 -1.7726900  
H 3.3366871 2.7619201 -3.7035950  
H 4.8029687 1.9444616 -1.5594623  
N 1.5857110 0.9807449 -1.4577715  
C 0.6076171 2.0128936 -3.4614088  
H 0.8119694 2.5903362 -4.3627269  
C -0.7100104 1.6937973 -3.1834145  
C -2.5155063 0.8587141 -2.2534752  
C -2.9456975 1.5779928 -3.4246990  
C -1.8241377 2.0902228 -4.0063658  
H -3.9793447 1.6642292 -3.7481522  
H -1.7392892 2.6912124 -4.9075488  
N -1.1435153 0.9518537 -2.0971904  
C -3.3613776 0.1183377 -1.4468195  
H -4.4213942 0.1028154 -1.6989654  
C -0.6385650 -1.8556301 2.0334395  
H -0.8274969 -2.5193698 2.8763475  
C -1.7138735 -1.4954699 1.2398878  
C -3.0661164 -1.9310783 1.4744431  
C -3.8333944 -1.3801174 0.4907873  
C -2.9480110 -0.6095159 -0.3444119  
H -3.3710526 -2.5700485 2.2985177  
H -4.9051801 -1.4669139 0.3348455  
N -1.6478768 -0.6862430 0.1206046  
H 3.8522465 -1.0312959 2.6289227  
Co -0.0220617 0.0197618 -0.7549610  
N 0.1421707 -1.6470245 -1.8883148  
C 0.4988680 -2.7949530 -1.1523626  
C 1.3365972 -4.9476094 0.3712760  
C 1.8914868 -3.0271402 -0.9734315  
C -0.4373486 -3.6778886 -0.5976745  
C -0.0340963 -4.7638518 0.1673516  
C 2.2995185 -4.1086680 -0.1830174  
H -0.7472652 -5.4488151 0.6181425  
H 3.3540121 -4.3117079 -0.0045192  
N 1.7881854 -6.0724699 1.2153260  
O 3.0055909 -6.2163343 1.3882202  
O 0.9245013 -6.8082808 1.7091618  
N 2.7879422 -2.2244654 -1.6479135  
H 2.3860143 -1.3430306 -1.9685244  
H 3.7072245 -2.1253960 -1.2302088  
C -0.9485032 -3.0263379 -3.5457392  
C -0.6173029 -4.3816720 -3.6358775  
C 0.0852411 -7.1174543 -3.7024244  
C 0.7449430 -4.7873365 -3.7760488  
C -1.6129430 -5.3961501 -3.5574238  
C -1.2594121 -6.7387854 -3.5856394  
C 1.0801417 -6.1333704 -3.7983190  
H 1.5179342 -4.0196648 -3.8251779
